# Supplementary material for: The Association between Autoimmune Thyroid Disease and Ocular Surface Damage: A Retrospective Population-Based Cohort Study
Source: MDPI journal article supplement (doi:10.3390/jcm12093203), 2023-04-29
Supplement: s1 [file s1]

**Supplementary Table S1.** ICD-9-CM codes of exposure factors, coexisting diseases, and study outcomes

| Exposure factor                       |                                               |
|---------------------------------------|-----------------------------------------------|
| Autoimmune thyroid disease            | 242, 245.2                                    |
| Exclusion criteria                    |                                               |
| Dry eye disease                       | 370.33, 372.53, 375.15, 710.2                 |
| Corneal ulcer                         | 370.0                                         |
| Recurrent corneal erosion             | 371.42                                        |
| Corneal scar                          | 371.0                                         |
| Interstitial and deep keratitis       | 370.5                                         |
| Corneal neovascularization            | 370.6                                         |
| Ocular burn                           | 940                                           |
| Open globe injury                     | 871                                           |
| Coexisting disease                    |                                               |
| Hypertension                          | 401-405                                       |
| Diabetes mellitus                     | 250                                           |
| Coronary artery disease               | 410-414                                       |
| Chronic obstructive pulmonary disease | 490, 491, 496                                 |
| Chronic liver disease                 | 571                                           |
| Chronic kidney disease                | 585                                           |
| Cerebrovascular disease               | 430-438                                       |
| Depressive disorder                   | 296.2, 296.3                                  |
| Anxiety disorder                      | 300                                           |
| Sleeping disorder                     | 307.41, 307.42, 327.0, 780.50, 780.52, 292.85 |
| Cancer                                | 140-208, 230-234                              |
| Study outcome                         |                                               |
| Dry eye disease                       | 370.33, 372.53, 375.15, 710.2                 |
| Sjögren's syndrome                    | 710.2                                         |
| Corneal ulcer                         | 370.0                                         |
| Recurrent corneal erosion             | 371.42                                        |
| Corneal scar                          | 371.0                                         |
