# Supplementary figures and images for: The Association between Autoimmune Thyroid Disease and Ocular Surface Damage: A Retrospective Population-Based Cohort Study
Source: MDPI journal article supplement (doi:10.3390/jcm12093203), 2023-04-29

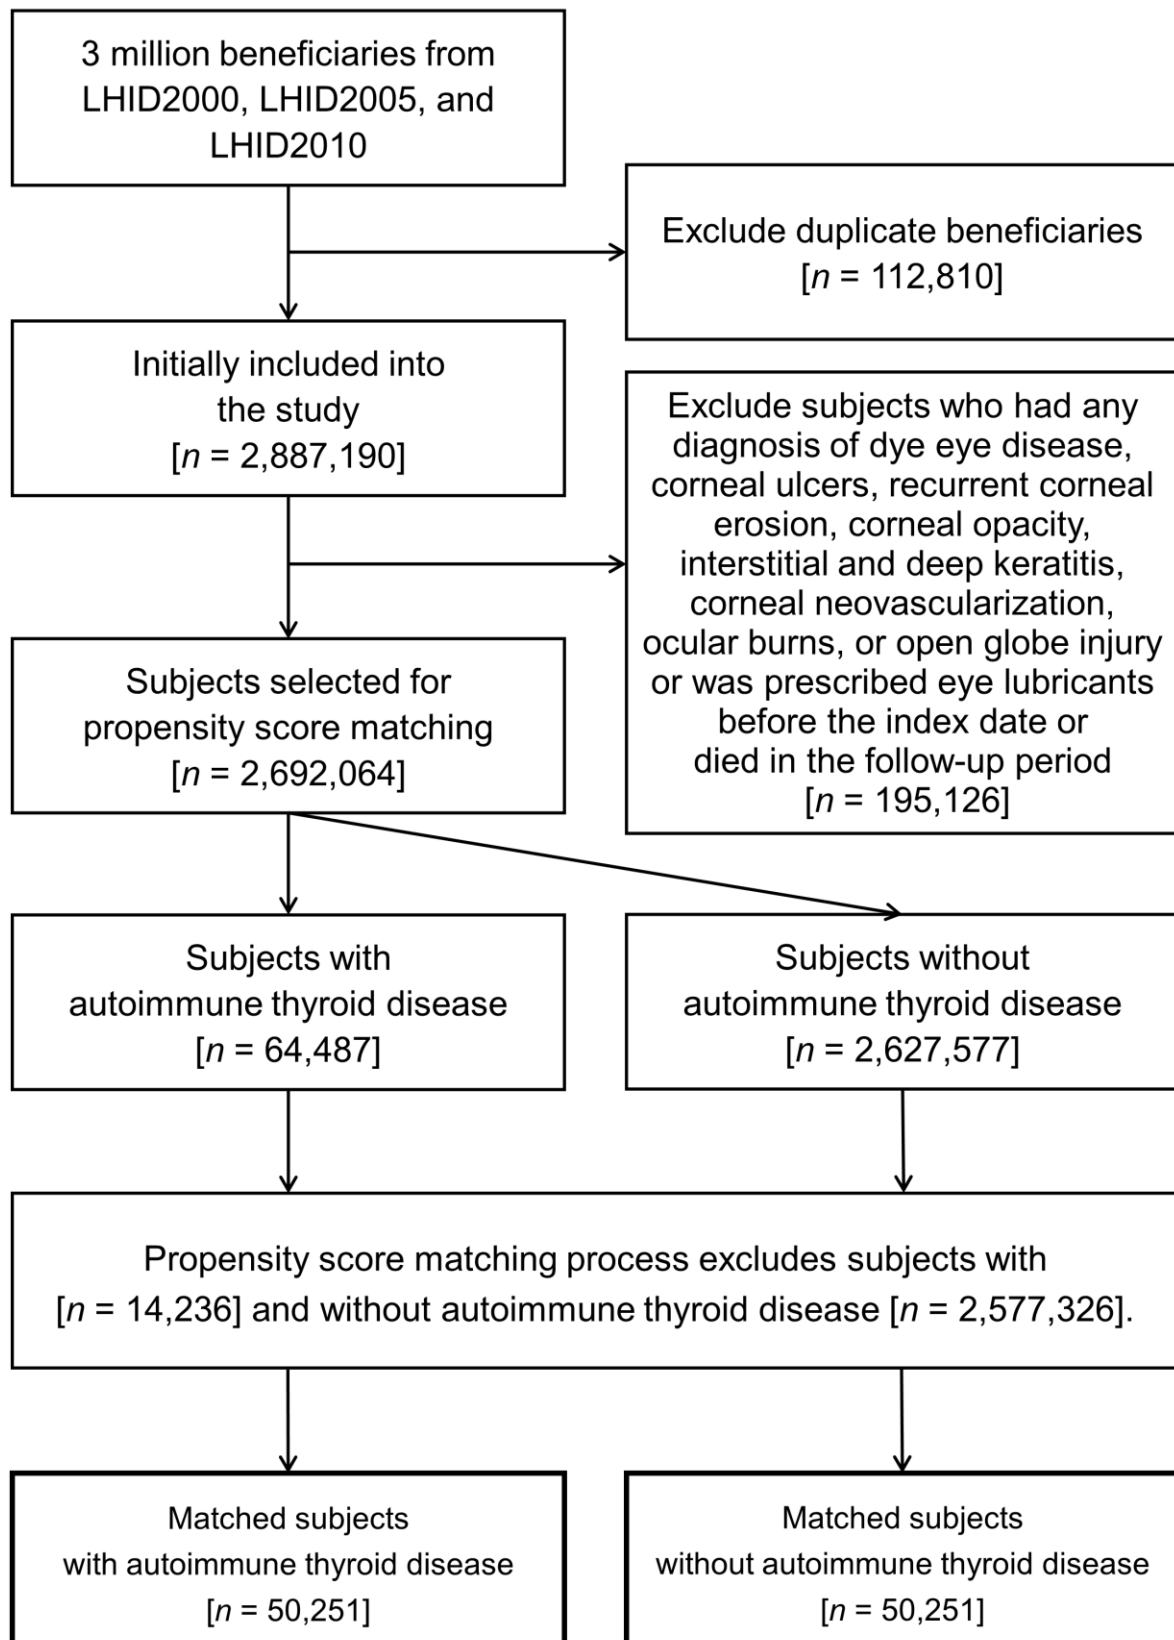

Figure S1. Flow diagram for patient selection.

Supplement: s1 [file s1]
